# Supplementary material
Source: Research Square preprint supplement (doi:10.21203/rs.3.rs-8454576/v1)
Supplement: Supplementary file 1 [file 3a3989977efc353d597a6842.xlsx]

## Sheet: raw_data_level
Year	Applicants_million	Applicants_count	Application_growth_pct	GDP_growth_pct	Urban_unemployment_pct	Undergrad_grads_million	Undergrad_grads_count	Undergrad_grads_source
2006	1.27	1270000	8.6	12.7	4.1	3.7747	3774700	MOE 2006 Education Development Statistical Bulletin (Higher education: regular HEI graduates in undergraduate/junior college)
2007	1.28	1280000	0.8	14.2	4	4.4779	4477900	MOE 2007 Education Development Statistical Bulletin (Higher education: regular HEI graduates in undergraduate/junior college)
2008	1.2	1200000	-6.3	9.6	4.2
2009	1.25	1250000	4.2	9.4	4.3
2010	1.4	1400000	12	10.6	4.1
2011	1.51	1510000	7.9	9.6	4.1
2012	1.65	1650000	9.3	7.9	4.1
2013	1.76	1760000	6.7	7.8	4.1
2014	1.72	1720000	-2.3	7.3	4.1
2015	1.64	1640000	-4.7	6.9	4.1
2016	1.77	1770000	7.3	6.7	4
2017	2	2000000	13	6.9	3.9
2018	2.38	2380000	19	6.6	4.9
2019	2.9	2900000	21.9	6.1	5.2	7.5853	7585300	MOE 2019 Education Development Statistical Bulletin (Higher education: regular undergraduate/junior college graduates)
2020	3.41	3410000	17.6	2.3	5.2
2021	3.77	3770000	10.6	8.1	5.1	4.281	4281000	MOE 2021 Statistical Bulletin (CYOL repost) – 普通本科毕业生 428.10万人
2022	4.57	4570000	21.2	3	5.6	4.7157	4715700	MOE 2022 Statistical Bulletin (Gov.cn) – 普通本科毕业生 471.57万人
2023	4.74	4740000	3.7	5.2	5.2	4.8974	4897400	MOE 2023 Statistical Bulletin (CEE) – 普通本科毕业生 489.74万人
2024	4.38	4380000	-7.6	5	5.1	5.1196	5119600	MOE 2024 Statistical Bulletin (CEE) – 普通本科毕业生 511.96万人
2025	3.88	3880000	-11.4		5.2			Not reported (official bulletin not yet available at time of analysis); 2025 cohort size not used.

## Sheet: cleaned_data
Year	Applicants_million	Applicants_count	Application_growth_pct	GDP_growth_pct	Urban_unemployment_pct	Undergrad_grads_million	Undergrad_grads_count	Undergrad_grads_source	Applicants_count_imputed	Undergrad_grads_count_imputed	Applicants_count_rule	Undergrad_grads_count_rule
2006	1.27	1270000	8.6	12.7	4.1	3.7747	3774700	MOE 2006 Education Development Statistical Bulletin (Higher education: regular HEI graduates in undergraduate/junior college)	1270000	0	as_provided	Filled from official bulletin / official news release
2007	1.28	1280000	0.8	14.2	4	4.4779	4477900	MOE 2007 Education Development Statistical Bulletin (Higher education: regular HEI graduates in undergraduate/junior college)	1280000	0	as_provided	Filled from official bulletin / official news release
2008	1.2	1200000	-6.3	9.6	4.2				1200000		as_provided	missing
2009	1.25	1250000	4.2	9.4	4.3				1250000		as_provided	missing
2010	1.4	1400000	12	10.6	4.1				1400000		as_provided	missing
2011	1.51	1510000	7.9	9.6	4.1				1510000		as_provided	missing
2012	1.65	1650000	9.3	7.9	4.1				1650000		as_provided	missing
2013	1.76	1760000	6.7	7.8	4.1				1760000		as_provided	missing
2014	1.72	1720000	-2.3	7.3	4.1				1720000		as_provided	missing
2015	1.64	1640000	-4.7	6.9	4.1				1640000		as_provided	missing
2016	1.77	1770000	7.3	6.7	4				1770000		as_provided	missing
2017	2	2000000	13	6.9	3.9				2000000		as_provided	missing
2018	2.38	2380000	19	6.6	4.9				2380000		as_provided	missing
2019	2.9	2900000	21.9	6.1	5.2	7.5853	7585300	MOE 2019 Education Development Statistical Bulletin (Higher education: regular undergraduate/junior college graduates)	2900000	0	as_provided	Filled from official bulletin / official news release
2020	3.41	3410000	17.6	2.3	5.2				3410000		as_provided	missing
2021	3.77	3770000	10.6	8.1	5.1	4.281	4281000	MOE 2021 Statistical Bulletin (CYOL repost) – 普通本科毕业生 428.10万人	3770000	4281000	as_provided	as_provided
2022	4.57	4570000	21.2	3	5.6	4.7157	4715700	MOE 2022 Statistical Bulletin (Gov.cn) – 普通本科毕业生 471.57万人	4570000	4715700	as_provided	as_provided
2023	4.74	4740000	3.7	5.2	5.2	4.8974	4897400	MOE 2023 Statistical Bulletin (CEE) – 普通本科毕业生 489.74万人	4740000	4897400	as_provided	as_provided
2024	4.38	4380000	-7.6	5	5.1	5.1196	5119600	MOE 2024 Statistical Bulletin (CEE) – 普通本科毕业生 511.96万人	4380000	5119600	as_provided	as_provided
2025	3.88	3880000	-11.4		5.2			Not reported (official bulletin not yet available at time of analysis); 2025 cohort size not used.	3880000		as_provided	not_used_missing_2025_definition_constraint

## Sheet: policy_documents_full
Document_title	Date	Issuing_body	Orientation	Signal_content_keywords	URL
Outline of the National Medium- and Long-Term Education Reform and Development Plan (2010–2020)	2010-07-29	State Council	Expansion-oriented	Scale expansion; capacity building	https://www.gov.cn/jrzg/2010-07/29/content_1667143.htm
Opinions on Deepening the Reform of Graduate Education	2013-04-19	MOE; NDRC; MOF	Expansion/quality reform	Reform; quality; funding mechanisms	https://www.moe.gov.cn/srcsite/A22/s7065/201304/t20130419_154118.html
Several Opinions on Strengthening Quality Assurance of Graduate Education	2014-02-12	Academic Degrees Committee of the State Council; MOE	Quality assurance	Thesis spot-check; supervisor management; QA system	https://www.moe.gov.cn/srcsite/A22/s7065/201402/t20140212_165554.html
Measures for Spot-checking Doctoral and Master's Theses	2014-02-12	Academic Degrees Committee of the State Council; MOE	Quality assurance	Thesis spot-check rules	https://www.moe.gov.cn/srcsite/A22/s7065/201402/t20140212_165556.html
Overall Plan for Promoting the Construction of World-Class Universities and Disciplines (“Double First-Class” Initiative)	2015-11-05	State Council	Differentiation/elite focus	Differentiation; discipline excellence; funding	https://www.moe.gov.cn/jyb_xxgk/moe_1777/moe_1778/201511/t20151105_217823.html
Implementation Measures for the Double First-Class Initiative	2017-01-25	MOE; MOF; NDRC	Differentiation/elite focus	Dynamic selection; differentiated development	https://www.moe.gov.cn/srcsite/A22/moe_843/201701/t20170125_295701.html
13th Five-Year Plan for Degree and Graduate Education Development	2017-01-20	MOE (repository)	System building/quality	Planning; structure optimization; QA	https://www.moe.gov.cn/srcsite/A22/s7065/201701/W020170120316772736161.docx
Opinions on Accelerating the Reform and Development of Graduate Education in the New Era (press conference page)	2020-09-22	MOE; NDRC; MOF	Quality-oriented recalibration	Ten actions; structural optimization; professional degrees	https://www.moe.gov.cn/fbh/live/2020/52461/
Opinions on Accelerating the Reform and Development of Graduate Education in the New Era (official text)	2020-09-21	MOE; NDRC; MOF	Quality-oriented recalibration	Quality over quantity; structural adjustment; strict exit	https://www.moe.gov.cn/srcsite/A22/s7065/202009/t20200921_489271.html
Plan for the Development of Professional Degree Graduate Education (2020–2025)	2020-09-30	MOE	Professional degree expansion	Professional degree; industry integration	https://www.moe.gov.cn/srcsite/A22/moe_826/202009/W020200930357734729917.docx
Basic Conditions for Degree Authorization Review Applications (2020)	2020-09-30	MOE	Authorization/quality	Authorization conditions; QA; diversion mechanism	https://www.moe.gov.cn/srcsite/A22/yjss_xwgl/moe_818/202009/W020200930377163528166.pdf
Further Strictly Regulating Degree and Graduate Education Management	2020-09-28	Academic Degrees Committee of the State Council; MOE	Quality assurance	Regulation; evaluation; accountability	https://www.moe.gov.cn/srcsite/A22/moe_826/202009/t20200928_492182.html
Opinions on Strengthening Doctoral Supervisor Position Management	2020-09-27	MOE	Quality assurance	Supervisor appointment, evaluation, accountability	https://www.moe.gov.cn/srcsite/A22/s7065/202009/t20200927_491838.html
Measures for Qualified Assessment of Degree Authorization Points (cycle/periodic)	2021-01-15	MOE	Quality assurance	Qualified assessment; evaluation cycles	https://www.moe.gov.cn/srcsite/A22/yjss_xwgl/moe_818/202101/W020210115494170850516.doc
Q&A: New Graduate Education Discipline & Specialty Catalog (interview)	2022-09-14	Academic Degrees Committee Office	Catalog/structural adjustment	Catalog rationale; management rules	https://www.moe.gov.cn/jyb_xwfb/s271/202209/t20220914_660966.html
Notice on Issuing Graduate Education Discipline and Specialty Catalog (2022) and Management Measures	2022-09-14	Academic Degrees Committee of the State Council; MOE	Catalog/structural adjustment	New catalog effective 2023	https://www.moe.gov.cn/srcsite/A22/moe_833/202209/t20220914_660828.html
Graduate Education Discipline and Specialty Catalog (2022) (PDF)	2022-09-14	Academic Degrees Committee of the State Council; MOE	Catalog/structural adjustment	Full catalog document	https://www.moe.gov.cn/srcsite/a22/moe_833/202209/W020220914572994461110.pdf
Opinions on Deepening the Classified Development of Academic and Professional Graduate Education	2023-12-19	MOE	Retrenchment/rationalisation	Classified development; quality system	https://www.gov.cn/zhengce/zhengceku/202312/content_6922068.htm
MOE briefing: Advancing classified development and building high-quality graduate education system	2023-12-19	MOE	Retrenchment/rationalisation	Classified thesis requirements; evaluation	https://www.moe.gov.cn/fbh/live/2023/55658/sfcl/202312/t20231219_1095125.html
Intro page: Discipline Catalog section (portal)	2022-09-14	MOE	Catalog/structural adjustment	Portal index	https://www.moe.gov.cn/srcsite/A22/moe_833/
Double First-Class policy files index	2015-11-05	MOE	Differentiation/elite focus	Policy index	https://www.moe.gov.cn/s78/A22/A22_ztzl/ztzl_tjsylpt/sylpt_zcwj/
Q&A on Double First-Class overall plan	2015-11-04	MOE	Differentiation/elite focus	Interpretation of plan	https://www.moe.gov.cn/jyb_xwfb/s271/201511/t20151104_217639.html
Policy interpretation: World-class universities path (speech/article)	2017-03-07	MOE	Differentiation/elite focus	Dynamic competition; differentiated development	https://www.moe.gov.cn/jyb_xwfb/s5148/201703/t20170307_298454.html
News briefing: Degree & thesis spot-check and follow-up handling (policy Q&A)	2021-02-04	MOE	Quality assurance	Handling after spot-check	https://www.moe.gov.cn/jyb_hygq/hygq_zczx/moe_1346/moe_1357/202102/t20210204_512564.html

## Sheet: policy_coding_rubric
Dimension	Operational definition	Keywords/phrases (CN)	Keywords/phrases (EN)	Coding rule (Expansion vs Recalibration)	Illustrative example (document-year)
Scale orientation	Whether the document explicitly endorses expansion of graduate enrollment scale vs emphasizes stabilization/capping/optimization.	扩大招生规模; 扩招; 增量; 提升招生计划; 扩大研究生培养规模	expand enrollment; increase quotas; enlarge scale; capacity expansion	Expansion if scale-increase language is dominant and framed as policy goal; Recalibration if stabilization/optimization dominates or expansion is limited to targeted/structural rebalancing.	State Council 'Outline of the National Medium- and Long-Term Education Reform and Development Plan (2010–2020)' (2010): frames system capacity building and expansion as core task.
Structural emphasis	Whether the document shifts degree structure (academic vs professional), field/sector priorities, or institutional stratification.	专业学位; 学术学位; 结构调整; 优化结构; 双一流; 分类发展; 差异化	professional degree; academic degree; structural adjustment; differentiation; elite concentration	Recalibration if it foregrounds restructuring, professional-degree expansion, and differentiated training functions; Expansion if structure is secondary to broad capacity building.	MOE 'Opinions on Accelerating the Reform and Development of Graduate Education in the New Era' (2020): emphasizes structural optimization and professional-degree development.
Quality assurance / exit mechanisms	Whether the document stresses quality control, stricter standards, evaluation, and exit/withdrawal mechanisms.	质量保障; 质量提升; 严进严出; 退出机制; 学位点评估; 监督; 清退	quality assurance; strict standards; exit mechanism; program evaluation; supervision	Recalibration if quality/exit language is central and linked to stabilizing or rationalizing scale; Expansion if quality language is present but subordinate to expansion goals.	MOE 'Notice on Further Strengthening Quality Assurance and Structural Adjustment in Graduate Education' (2023): stresses quality assurance, structural adjustment, and exit mechanisms.
Cost / financing orientation	Whether the document implies privatization of costs, tuition/fee changes, or funding reforms affecting expected net returns.	收费; 学费; 经费保障; 财政投入; 成本分担; 专业学位收费	tuition; fees; funding reform; cost-sharing	Recalibration if it increases/explicitly discusses cost-sharing or professional degree expansion with fee implications; Neutral if not addressed.	MOE documents promoting professional-degree expansion often reference funding/tuition arrangements for professional tracks; coded only when cost-sharing language is explicit.
Implementation lag rule	How policy year is mapped to application cycle year.	发布/实施; 招生计划; 当年/次年; 考试周期	issuance vs implementation; intake cycle; next-year	Signal-year is publication year; first impact year is next application cycle unless the document specifies immediate effect.	Lag rule applied consistently: 2023 policy issuance -> 2024 first impact year in application-cycle coding.

## Sheet: replication_summary
Check	Value
Package_generated_utc	2026-01-13T19:10:46Z
analysis_rows	20
analysis_year_min	2006
analysis_year_max	2025
raw_rows	20
missing_Applicants_count	0
missing_Applicants_growth_yoy_pct	0
missing_Urban_unemployment_pct	0
missing_GDP_growth_pct	1
missing_Undergrad_grads_count	14
missing_Applicants_per_undergrad_grad	18
missing_Retrenchment_dummy	0
missing_Transition_year_dummy	0
missing_Log_applicants	0
missing_Log_unemployment	0

## Sheet: replicated_table2_regression
term	coef	se_HAC	t	p	N	R2
const	-25.0128	21.3444	-1.17187	0.24125	19	0.473783
Urban_unemployment_pct	7.98675	3.82231	2.08951	0.036662	19	0.473783
GDP_growth_pct	-0.288183	0.591324	-0.487352	0.626009	19	0.473783
Retrenchment_dummy	-21.8787	2.20754	-9.9109	0	19	0.473783

## Sheet: official_source_links
Variable/Series	Official publisher	Root URL	Notes	Item	Official_source	URL
Applicants (postgraduate entrance exam)	MOE / NEEA official releases, annual press briefings	https://www.moe.gov.cn/ ; https://www.neea.edu.cn/	Use official annual releases for 报名人数; archive each link in policy_documents_full.
Urban unemployment rate (%)	National Bureau of Statistics (NBS) annual series / yearbook tables	https://www.stats.gov.cn/ ; https://data.stats.gov.cn/	Prefer official NBS tables; keep a snapshot (PDF/HTML) for each year used.
GDP growth (%)	NBS annual GDP growth series / statistical communiqués	https://www.stats.gov.cn/	Record exact table name + year for traceability.
Undergraduate graduates (count)	MOE Education Statistics: 普通本、专科分性质类别学生数 (年度表)	https://hudong.moe.gov.cn/jyb_sjzl/moe_560/	Extract Graduates → Total → Normal Courses (本科).
			Contains the regular HEI undergraduate/junior-college graduates count for 2006 (377.47 万人).	Undergrad_grads_count (2006)	MOE bulletin mirror (CEE)	https://www.cee.edu.cn/n171/n459/n472/c181602/content.html
			Contains the regular HEI undergraduate/junior-college graduates count for 2007 (447.79 万人).	Undergrad_grads_count (2007)	MOE bulletin mirror (CEE)	https://www.cee.edu.cn/n171/n459/n472/c181551/content.html
			Contains the regular undergraduate/junior-college graduates count for 2019 (758.53 万人).	Undergrad_grads_count (2019)	MOE bulletin mirror (CHSI)	https://gaokao.chsi.com.cn/gkxx/zc/moe/202005/20200521/1916946692.html
			Provides the official projection that China will have 12.22 million college graduates in 2025.	Undergrad_grads_count (2025 projection)	Xinhua via Reuters	https://www.reuters.com/world/china/record-number-students-graduate-college-china-2025-2024-11-14/

## Sheet: undergrad_grads_sources
Year	Undergrad_grads_count	Undergrad_grads_million	Source_type	Source_url	Field_excerpt
2006	3774700	3.7747	Official bulletin (mirror)	https://www.cee.edu.cn/n171/n459/n472/c181602/content.html	Regular HEI undergraduate/junior-college graduates (377.47 万人)
2007	4477900	4.4779	Official bulletin (mirror)	https://www.cee.edu.cn/n171/n459/n472/c181551/content.html	Regular HEI undergraduate/junior-college graduates (447.79 万人)
2019	7585300	7.5853	Official bulletin (mirror)	https://gaokao.chsi.com.cn/gkxx/zc/moe/202005/20200521/1916946692.html	Regular undergraduate/junior-college graduates (758.53 万人)
2025	12220000	12.22	Official projection (news citing state media)	https://www.reuters.com/world/china/record-number-students-graduate-college-china-2025-2024-11-14/	Expected number of college graduates in 2025 (12.22 million)

## Sheet: analysis_data_final
Year	Applicants_count	Applicants_growth_yoy_pct	Urban_unemployment_pct	GDP_growth_pct	Undergrad_grads_count	Applicants_per_undergrad_grad	Retrenchment_dummy	Transition_year_dummy	Log_applicants	Log_unemployment	Urban_unemployment_lag1
2006	1270000	8.6	4.1	12.7	3774700		0	0	14.0545	1.41099
2007	1280000	0.8	4	14.2	4477900		0	0	14.0624	1.38629	4.1
2008	1200000	-6.3	4.2	9.6	4736850		0	0	13.9978	1.43508	4
2009	1250000	4.2	4.3	9.4	4995800		0	0	14.0387	1.45862	4.2
2010	1400000	12	4.1	10.6	5254750		0	0	14.152	1.41099	4.3
2011	1510000	7.9	4.1	9.6	5513700		0	0	14.2276	1.41099	4.1
2012	1650000	9.3	4.1	7.9	5772650		0	0	14.3163	1.41099	4.1
2013	1760000	6.7	4.1	7.8	6031600		0	0	14.3808	1.41099	4.1
2014	1720000	-2.3	4.1	7.3	6290550		0	0	14.3578	1.41099	4.1
2015	1640000	-4.7	4.1	6.9	6549500		0	0	14.3102	1.41099	4.1
2016	1770000	7.3	4	6.7	6808450		0	0	14.3865	1.38629	4.1
2017	2000000	13	3.9	6.9	7067400		0	0	14.5087	1.36098	4
2018	2380000	19	4.9	6.6	7326350		0	0	14.6826	1.58924	3.9
2019	2900000	21.9	5.2	6.1	7585300		0	0	14.8802	1.64866	4.9
2020	3410000	17.6	5.2	2.3	5933150		0	0	15.0422	1.64866	5.2
2021	3770000	10.6	5.1	8.1	4281000	0.880635	0	0	15.1426	1.62924	5.2
2022	4570000	21.2	5.6	3	4715700	0.969103	0	0	15.335	1.72277	5.1
2023	4740000	3.7	5.2	5.2	4897400	0.96786	0	1	15.3715	1.64866	5.6
2024	4380000	-7.6	5.1	5	5119600	0.855536	1	0	15.2926	1.62924	5.2
2025	3880000	-11.4	5.2				1	0	15.1713	1.64866	5.1

## Sheet: replicated_table2_pooled_HAC
term	coef	se_HAC
Urban unemployment rate (%)	6.12371	4.3829
GDP growth (%)	-0.1567	0.603474
Constant	-18.8001	22.3961

[truncated: 10 more sheets: replicated_table2_meta, replicated_table3_forecast, replicated_table1_series, table_figure_data_map, data_processing_notes, variable_dictionary, policy_coding, replication_notebook, README, outputs_mapping]
