# Supplementary material
Source: Research Square preprint supplement (doi:10.21203/rs.3.rs-8454576/v1)
Supplement: Supplementary file 1 [file f2b7b32d96eb0372fa929e4b.docx]

**Appendix A**

**Appendix A. Data sources, variable definitions, and policy-phase coding**

**A1. Data sources and data construction**

All variables used in the analysis are derived from publicly available official statistical sources released by central government agencies in China. Annual data are compiled at the national level and harmonised to ensure temporal consistency across sources.

Postgraduate application data Data on postgraduate entrance examination applicants are obtained from annual statistical releases issued by the Ministry of Education of the People’s Republic of China (MOE). Specifically, applicant counts are sourced from the National Graduate Enrollment Statistics published on the official MOE website and cross-checked against corresponding figures reported in the Educational Statistics Yearbook of China to ensure internal consistency across years.

The dependent variable—Postgraduate Application Growth—is calculated as the year-on-year percentage change in the total number of applicants. Growth-rate observations span 2006–2025. For clarity, the 2025 observation refers to applications for the 2025 intake (exams conducted in late 2024).

Macroeconomic indicators Macroeconomic data are drawn from the National Bureau of Statistics of China (NBS) through the China Statistical Yearbook. Two indicators are employed:

1. Urban Unemployment Rate: Capturing aggregate labour-market pressure.
2. Real GDP Growth: Reflecting macroeconomic conditions and opportunity costs.

Note on 2025 Data: For all years up to 2024, finalised annual GDP growth values are used. Because finalised annual GDP statistics for 2025 were not yet available at the time of analysis, GDP growth for 2025 is not used in the regression diagnostics. The 2025 application data is retained for descriptive trend analysis only.

**A2. Unemployment indicator definition**

Choice of Unemployment Measure: The principal labour-market indicator used in the analysis is the official annual Registered Urban Unemployment Rate reported by the NBS. This series is employed in the main diagnostic specifications to ensure long-run internal consistency across the full 2006–2025 observation window. While China’s official unemployment reporting has evolved (e.g., the shift to surveyed unemployment), we rely on the consistent registered series for the historical baseline to avoid artificial structural breaks arising purely from statistical definition changes.

Consistency Checks: To evaluate whether the main findings are sensitive to the choice of unemployment indicator, we examined alternative labour market proxies for the subset of years in which they are publicly available, including the surveyed urban unemployment rate and youth-related unemployment statistics. While these series do not extend far enough back to support full-sample regime diagnostics, their short-run co-movement with postgraduate application growth is directionally consistent with the registered rate. In particular, the post-2023 decoupling between labour market pressure and application behaviour remains evident across available proxies, reinforcing the interpretation that the regime shift reflects behavioural adjustment rather than a measurement artefact.

**A3. Policy-phase identification and classification**

Table A summarises phase classification, while Table B reports the underlying document-level coding.Policy phases are identified using a rule-based classification of authoritative central government policy documents. Importantly, policy phases are defined ex-ante, based on the timing and substantive content of documents, rather than on observed application outcomes.

Lag Structure in Coding: Crucially, the "Retrenchment Regime" is coded as starting in 2024. This reflects the implementation lag: The key directive “Notice on Further Strengthening Quality Assurance” was issued in 2023, which effectively constrained the enrolment plan for the 2024 intake cycle. Thus, 2023 is the "signal year," and 2024 is the first "impact year."

**Table A. Policy-phase coding for graduate education in China**

| Policy Phase | Time Window | Dominant Policy Orientation | Representative Policy Documents |
| --- | --- | --- | --- |
| Expansion Phase | 2006–2023 | Rapid expansion of postgraduate enrolment capacity and system building | Outline of the National Medium- and Long-Term Education Reform (2010); Opinions on Deepening Reform (2013) |
| Retrenchment Phase | 2024–2025 | Quality-oriented rationalisation, stabilisation of scale, and structural adjustment | Notice on Further Strengthening Quality Assurance (MOE, 2023); Opinions on Deepening Reform (2024) |

*Note: The binary "Retrenchment" indicator used in the regression diagnostics takes the value of 1 for the years 2024–2025 and 0 otherwise. Coding is based on ex-ante policy issuance dates.*

**Table B. Policy-signal coding scheme and representative central policy documents**

| Document title (authoritative issuing body) | Date | Policy orientation | Signal content | Coding rule applied |
| --- | --- | --- | --- | --- |
| Outline of the National Medium- and Long-Term Education Reform and Development Plan (2010–2020) (State Council) | Jul-10 | Expansion-oriented | Explicit endorsement of large-scale expansion of higher education and postgraduate enrolment capacity | Ex ante, document-based |
| Several Opinions on Deepening the Reform of Graduate Education (Ministry of Education) | Mar-13 | Expansion-oriented | Policy support for expanding postgraduate training capacity and improving access | Ex ante, document-based |
| Overall Plan for Promoting the Construction of World-Class Universities and Disciplines (“Double First-Class” Initiative) (State Council) | Oct-15 | Consolidation and differentiation | Shift from quantity expansion to institutional differentiation and elite concentration | Ex ante, document-based |
| Opinions on Accelerating the Reform and Development of Graduate Education in the New Era (Ministry of Education) | Sep-20 | Quality-oriented recalibration | Emphasis on structural optimisation, professional degree expansion, and quality improvement | Ex ante, document-based |
| Implementation Plan for the Reform of Graduate Education (2021–2025) (Ministry of Education) | Mar-21 | Quality-oriented recalibration | Forward-looking emphasis on restructuring, efficiency improvement, and alignment with labour market demand | Ex ante, document-based |
| Notice on Further Strengthening Quality Assurance and Structural Adjustment in Graduate Education (Ministry of Education) | Feb-23 | Retrenchment and rationalisation | Explicit forward-looking signal of scale stabilisation and rational adjustment for the post-2023 period | Ex ante, document-based |

*Notes.Policy orientations are coded ex ante based on the timing and substantive content of authoritative central policy documents rather than observed application outcomes. Appendix A (Table A1) provides the full phase classification (2005–2025), while this table presents representative documents illustrating the coding logic underlying the parsimonious two-regime indicator used in the regression analysis.*

**Policy-signal coding rubric**

To ensure transparency and replicability, policy-phase classification follows a rule-based document coding rubric applied consistently across central government directives. Documents are evaluated along three thematic dimensions:

(1) Scale orientation: explicit endorsement of enrolment expansion versus language emphasising stabilisation, capping, or contraction of postgraduate scale;

(2) Structural emphasis: prioritisation of differentiated degree structures (e.g., professional versus academic tracks), institutional stratification, and exit mechanisms;

(3) Quality assurance discourse: references to “quality over quantity”, strengthened assessment standards, supervision mechanisms, or elimination of low-quality programmes.

Documents dominated by scale-expansion language and capacity-building mandates are classified as expansion-oriented, whereas documents that foreground structural adjustment, quality control, and rationalisation are classified as recalibration-oriented. Coding is based on substantive content rather than policy outcomes and is conducted ex ante according to document issuance dates. This rubric allows independent replication of the phase classification using the same set of authoritative policy texts.

**A4. Variable definitions**

**Table A2. Variable definitions and measurement**

| Variable | Definition | Measurement | Unit | Data Source |
| --- | --- | --- | --- | --- |
| Postgraduate Application Growth | Annual growth rate of applicants | Year-on-year percentage change in total applicants | Percentage points (%) | MOE Statistical Releases |
| Urban Unemployment Rate | Aggregate labour-market pressure | Official annual urban unemployment rate | Percentage (%) | National Bureau of Statistics (NBS) |
| GDP Growth | Macroeconomic conditions | Final annual real GDP growth (through 2024) | Percentage (%) | National Bureau of Statistics (NBS) |
| Retrenchment Regime | Policy recalibration indicator | Dummy variable: 1 if Year ≥ 2024, else 0 | Binary (0/1) | Authors’ coding based on policy documents |

**A5.** **Forecast-Based Robustness and Validity Checks**

This appendix reports a set of robustness diagnostics designed to evaluate whether the post-2023 divergence in postgraduate application behaviour reflects a regime-consistent structural shift rather than a modelling artefact. All checks employ out-of-sample forecast diagnostics.

**A5.1 Placebo Transition-Year Diagnostics (Forecast-Failure Specificity)**

To assess whether the observed post-2023 forecast failure could arise mechanically at arbitrary points, we implement placebo transition-year tests on pseudo transition years (2018, 2019, 2020):

1.Estimate the baseline expansion-period model up to the placebo cut-off year.

2.Generate a one-step-ahead out-of-sample prediction.

3.Evaluate whether the realised application growth falls within the 95% prediction interval.

Result: Across all placebo specifications, realised outcomes remain within the historical prediction envelope. No comparable forecast failure is observed. This confirms that the post-2023 divergence is specific to the recalibration window.

**A5.2 Rolling-Origin One-Step-Ahead Forecast Diagnostics**

As an additional robustness check, we implement a rolling-origin one-step-ahead forecast procedure. For each year *t* from 2012 onward (ensuring a sufficiently long estimation window), we estimate the baseline model using all observations up to year

*t*−1 and generate a prediction for year *t*, along with a 95% prediction interval.

Result: Throughout the pre-2023 period, realised outcomes consistently fall within the historical prediction envelope. In contrast, the post-2023 observations (2024 and 2025) constitute clear forecast failures. This reinforces that the post-2023 deviation is an exceptional divergence rather than a continuation of historical volatility.

**A5.3 Influence Diagnostics (Leave-One-Out Tests)**

To verify that the expansion-period baseline relationship is not driven by a small number of influential observations (such as the 2020 COVID shock), we conduct leave-one-out influence diagnostics. Specifically, we sequentially exclude each year from the 2006–2022 expansion-period estimation window and re-estimate the baseline model.

Across all iterations, the sign and general magnitude of the unemployment coefficient remain stable, and the resulting prediction intervals continue to place the post-2023 observations well outside the historical envelope. This indicates that the detected forecast failure is not attributable to leverage effects associated with any single year.

**A5.4 Alternative Phase Boundaries**

Because policy recalibration may unfold gradually rather than instantaneously, we test the sensitivity of the findings to alternative definitions of the transition onset. When the recalibration phase is coded as beginning in 2023 (rather than treating 2023 as a signal year and 2024 as the first impact year), the post-transition observations still generate large negative forecast errors relative to the expansion-period model. Although the magnitude of the deviation is modestly attenuated, the qualitative conclusion of structural divergence remains unchanged. This supports the baseline coding choice while demonstrating that the results do not hinge on a single cut-off definition.

**A5.5 Alternative Unemployment Indicators**

A potential concern is that the main findings could be sensitive to the choice of labour-market indicator. While the registered urban unemployment rate is retained as the primary series due to its long-run consistency, we conduct supplementary diagnostics using alternative unemployment proxies for the subset of years in which they are publicly available, including the surveyed urban unemployment rate and youth-oriented labour-market indicators.

Although these alternative series do not span the full observation window required for regime diagnostics, their short-run co-movement with postgraduate application growth during the overlapping period mirrors that observed using the registered unemployment rate. Crucially, the post-2023 decoupling between labour-market pressure and application behaviour remains evident across available proxies, suggesting that the detected divergence is not an artefact of a particular unemployment definition.

**A5.6 Alternative Scaling of the Dependent Variable**

As an additional descriptive check, we examine the application ratio, defined as the number of postgraduate applicants divided by the number of regular undergraduate graduation counts, to assess whether the post-2023 decline could plausibly be attributed to a shrinking candidate base. The ratio exhibits the same directional break after 2023, reinforcing that the observed contraction reflects a decline in application propensity rather than a purely demographic contraction. Given the short post-transition window and the diagnostic nature of the study, this ratio-based check is interpreted descriptively rather than as a separate out-of-sample forecast model.

**Summary of Appendix A5 Diagnostics**

Taken together, the forecast-based robustness checks reported in this appendix demonstrate that the post-2023 breakdown of the historical “educational sheltering” relationship is robust to placebo transition tests, rolling-origin forecasts, influential observations, alternative phase boundaries, alternative unemployment indicators, and alternative scaling of the dependent variable. The consistency of these results supports the interpretation of a regime-consistent structural divergence rather than a transient fluctuation or modelling artefact.
